# Supplementary material for: Autosomal recessive LRP1-related syndrome featuring cardiopulmonary dysfunction, bone dysmorphology, and corneal clouding
Source: PubMed Central journal article supplement — Cold Spring Harb Mol Case Stud. 2022 Oct;8(6):a006169. doi: 10.1101/mcs.a006169 (PMC9632358; doi:10.1101/mcs.a006169), 2022-10
Supplement: supp_mcs.a006169_Supplemental_Material.pdf [file supp_mcs.a006169_Supplemental_Material.pdf]

**Table S1 Mouse homozygous knockout phenotypes curated within the MGI**

| <i>Allelic Composition</i> | <i>Homozygous</i> | <i>Genotype ID</i> | <i>Annotated Term</i>                                         | <i>Phenotype Summary</i> | <i>Referenc</i> |
|----------------------------|-------------------|--------------------|---------------------------------------------------------------|--------------------------|-----------------|
| Lrp1<b2b1554Clo>           | Global            | MGI:543711         | abnormal body wall morphology                                 | growth/size/body region  | J:175213        |
| Lrp1<b2b1554Clo>           | Global            | MGI:543711         | abnormal heart ventricle outflow tract morphology             | cardiovascular system    | J:175213        |
| Lrp1<b2b1554Clo>           | Global            | MGI:543711         | atrioventricular septal defect                                | cardiovascular system    | J:175213        |
| Lrp1<b2b1554Clo>           | Global            | MGI:543711         | diaphragmatic hernia                                          | muscle                   | J:175213        |
| Lrp1<b2b1554Clo>           | Global            | MGI:543711         | herniated abdominal wall                                      | growth/size/body region  | J:175213        |
| Lrp1<b2b1554Clo>           | Global            | MGI:543711         | omphalocele                                                   | growth/size/body region  | J:175213        |
| Lrp1<tm1.1(KOMP)Wtsi       | Global            | MGI:563127         | abnormal embryo size                                          | embryo                   | J:211773        |
| Lrp1<tm1.1(KOMP)Wtsi       | Global            | MGI:563127         | abnormal embryo size                                          | growth/size/body region  | J:211773        |
| Lrp1<tm1.1(KOMP)Wtsi       | Global            | MGI:563127         | abnormal limb bud morphology                                  | embryo                   | J:211773        |
| Lrp1<tm1.1(KOMP)Wtsi       | Global            | MGI:563127         | abnormal limb bud morphology                                  | limbs/digits/tail        | J:211773        |
| Lrp1<tm1.1(KOMP)Wtsi       | Global            | MGI:563127         | pallor                                                        | integument               | J:211773        |
| Lrp1<tm1.1(KOMP)Wtsi       | Global            | MGI:563127         | preweaning lethality, complete penetrance                     | mortality/aging          | J:211773        |
| Lrp1<tm1Her>               | Global            | MGI:218088         | embryonic growth retardation                                  | embryo                   | J:30077         |
| Lrp1<tm1Her>               | Global            | MGI:218088         | embryonic growth retardation                                  | growth/size/body region  | J:30077         |
| Lrp1<tm1Her>               | Global            | MGI:218088         | embryonic lethality during organogenesis, complete penetrance | mortality/aging          | J:30077         |
| Lrp1<tm1Her>               | Global            | MGI:218088         | internal hemorrhage                                           | cardiovascular system    | J:30077         |
| Lrp1<tm2Aimr>              | Global            | MGI:383034         | abnormal liver morphology                                     | liver/biliary system     | J:144146        |
| Lrp1<tm1Her>               | Global            | MGI:494355         | abnormal liver physiology                                     | liver/biliary system     | J:76281         |
| Lrp1<tm3Aimr>              | Global            | MGI:383035         | abnormal liver perisinusoidal space morphology                | liver/biliary system     | J:144146        |
| Lrp1<tm3Aimr>              | Global            | MGI:383035         | decreased hepatocyte number                                   | liver/biliary system     | J:144146        |
| Lrp1<tm3Aimr>              | Global            | MGI:383035         | lethality throughout fetal growth and development, incomplete | mortality/aging          | J:144146        |
| Lrp1<tm3Aimr>              | Global            | MGI:383035         | liver degeneration                                            | liver/biliary system     | J:144146        |
| Lrp1<tm3Aimr>              | Global            | MGI:383035         | perinatal lethality, complete penetrance                      | mortality/aging          | J:144146        |
| Lrp1<tm5Aimr>              | Global            | MGI:543356         | embryonic lethality during organogenesis, complete penetrance | mortality/aging          | J:186908        |
| Lrp1<tm2Her> Fabp4-        | Adipose           | MGI:494373         | abnormal adipose tissue amount                                | adipose tissue           | J:127398        |
| Lrp1<tm2Her> Fabp4-        | Adipose           | MGI:494373         | abnormal adipose tissue physiology                            | adipose tissue           | J:127398        |
| Lrp1<tm2Her> Fabp4-        | Adipose           | MGI:494373         | abnormal body temperature homeostasis                         | homeostasis/metabolism   | J:127398        |
| Lrp1<tm2Her> Fabp4-        | Adipose           | MGI:494373         | abnormal brown fat cell morphology                            | adipose tissue           | J:127398        |
| Lrp1<tm2Her> Fabp4-        | Adipose           | MGI:494373         | abnormal circulating lipid level                              | homeostasis/metabolism   | J:127398        |
| Lrp1<tm2Her> Fabp4-        | Adipose           | MGI:494373         | abnormal fat pad morphology                                   | adipose tissue           | J:127398        |
| Lrp1<tm2Her> Fabp4-        | Adipose           | MGI:494373         | abnormal glucose homeostasis                                  | homeostasis/metabolism   | J:127398        |
| Lrp1<tm2Her> Fabp4-        | Adipose           | MGI:494373         | abnormal lipid homeostasis                                    | homeostasis/metabolism   | J:127398        |
| Lrp1<tm2Her> Fabp4-        | Adipose           | MGI:494373         | decreased body surface temperature                            | homeostasis/metabolism   | J:127398        |
| Lrp1<tm2Her> Fabp4-        | Adipose           | MGI:494373         | decreased body weight                                         | growth/size/body region  | J:127398        |
| Lrp1<tm2Her> Fabp4-        | Adipose           | MGI:494373         | decreased brown adipose tissue amount                         | adipose tissue           | J:127398        |
| Lrp1<tm2Her> Fabp4-        | Adipose           | MGI:494373         | decreased brown fat cell size                                 | adipose tissue           | J:127398        |
| Lrp1<tm2Her> Fabp4-        | Adipose           | MGI:494373         | decreased brown fat lipid droplet number                      | adipose tissue           | J:127398        |
| Lrp1<tm2Her> Fabp4-        | Adipose           | MGI:494373         | decreased circulating free fatty acids level                  | homeostasis/metabolism   | J:127398        |
| Lrp1<tm2Her> Fabp4-        | Adipose           | MGI:494373         | decreased circulating glucose level                           | homeostasis/metabolism   | J:127398        |
| Lrp1<tm2Her> Fabp4-        | Adipose           | MGI:494373         | decreased circulating insulin level                           | homeostasis/metabolism   | J:127398        |
| Lrp1<tm2Her> Fabp4-        | Adipose           | MGI:494373         | decreased circulating leptin level                            | homeostasis/metabolism   | J:127398        |
| Lrp1<tm2Her> Fabp4-        | Adipose           | MGI:494373         | decreased epididymal fat pad weight                           | adipose tissue           | J:127398        |
| Lrp1<tm2Her> Fabp4-        | Adipose           | MGI:494373         | decreased interscapular fat pad weight                        | adipose tissue           | J:127398        |
| Lrp1<tm2Her> Fabp4-        | Adipose           | MGI:494373         | decreased liver triglyceride level                            | homeostasis/metabolism   | J:127398        |
| Lrp1<tm2Her> Fabp4-        | Adipose           | MGI:494373         | decreased liver triglyceride level                            | liver/biliary system     | J:127398        |
| Lrp1<tm2Her> Fabp4-        | Adipose           | MGI:494373         | decreased susceptibility to diet-induced obesity              | growth/size/body region  | J:127398        |
| Lrp1<tm2Her> Fabp4-        | Adipose           | MGI:494373         | decreased susceptibility to diet-induced obesity              | homeostasis/metabolism   | J:127398        |
| Lrp1<tm2Her> Fabp4-        | Adipose           | MGI:494373         | decreased total body fat amount                               | adipose tissue           | J:127398        |
| Lrp1<tm2Her> Fabp4-        | Adipose           | MGI:494373         | decreased white fat cell size                                 | adipose tissue           | J:127398        |
| Lrp1<tm2Her> Fabp4-        | Adipose           | MGI:494373         | impaired adaptive thermogenesis                               | homeostasis/metabolism   | J:127398        |
| Lrp1<tm2Her> Fabp4-        | Adipose           | MGI:494373         | improved glucose tolerance                                    | homeostasis/metabolism   | J:127398        |
| Lrp1<tm2Her> Fabp4-        | Adipose           | MGI:494373         | increased energy expenditure                                  | homeostasis/metabolism   | J:127398        |
| Lrp1<tm2Her> Fabp4-        | Adipose           | MGI:494373         | increased food intake                                         | behavior/neurological    | J:127398        |
| Lrp1<tm2Her> Fabp4-        | Adipose           | MGI:494373         | increased muscle cell glucose uptake                          | cellular                 | J:127398        |
| Lrp1<tm2Her> Fabp4-        | Adipose           | MGI:494373         | increased muscle cell glucose uptake                          | muscle                   | J:127398        |
| Lrp1<tm2Her> Fabp4-        | Adipose           | MGI:494373         | increased oxygen consumption                                  | homeostasis/metabolism   | J:127398        |
| Lrp1<tm2Her> Fabp4-        | Adipose           | MGI:494373         | increased susceptibility to weight loss                       | growth/size/body region  | J:127398        |
| Lrp1<tm2Her> Fabp4-        | Adipose           | MGI:494373         | trunk curl                                                    | behavior/neurological    | J:127398        |
| Lrp1<tm2Her> Tagln-cre     | Smooth Muscle     | MGI:494374         | abnormal aorta elastic tissue morphology                      | cardiovascular system    | J:167799        |
| Lrp1<tm2Her> Tagln-cre     | Smooth Muscle     | MGI:494374         | abnormal aorta smooth muscle morphology                       | cardiovascular system    | J:167799        |
| Lrp1<tm2Her> Tagln-cre     | Smooth Muscle     | MGI:494374         | abnormal aorta smooth muscle morphology                       | muscle                   | J:167799        |
| Lrp1<tm2Her> Tagln-cre     | Smooth Muscle     | MGI:494374         | abnormal aorta tunica media morphology                        | cardiovascular system    | J:167799        |
| Lrp1<tm2Her> Tagln-cre     | Smooth Muscle     | MGI:494374         | abnormal vascular smooth muscle physiology                    | cardiovascular system    | J:167799        |
| Lrp1<tm2Her> Tagln-cre     | Smooth Muscle     | MGI:494374         | abnormal vascular smooth muscle physiology                    | muscle                   | J:167799        |
| Lrp1<tm2Her> Tagln-cre     | Smooth Muscle     | MGI:494374         | abnormal vascular wound healing                               | cardiovascular system    | J:167799        |
| Lrp1<tm2Her> Tagln-cre     | Smooth Muscle     | MGI:494374         | abnormal vascular wound healing                               | homeostasis/metabolism   | J:167799        |
| Lrp1<tm2Her> Tagln-cre     | Smooth Muscle     | MGI:494374         | decreased vasoconstriction                                    | cardiovascular system    | J:167799        |
| Lrp1<tm2Her> Tagln-cre     | Smooth Muscle     | MGI:494374         | decreased vasoconstriction                                    | muscle                   | J:167799        |
| Lrp1<tm2Her> Tagln-cre     | Smooth Muscle     | MGI:610294         | abnormal ascending aorta morphology                           | cardiovascular system    | J:209752        |
| Lrp1<tm2Her> Tagln-cre     | Smooth Muscle     | MGI:610294         | abnormal coronary artery morphology                           | cardiovascular system    | J:209752        |
| Lrp1<tm2Her> Tagln-cre     | Smooth Muscle     | MGI:610294         | abnormal heart echocardiography feature                       | cardiovascular system    | J:209752        |
| Lrp1<tm2Her> Tagln-cre     | Smooth Muscle     | MGI:610294         | abnormal myocardial fiber morphology                          | cardiovascular system    | J:209752        |
| Lrp1<tm2Her> Tagln-cre     | Smooth Muscle     | MGI:610294         | abnormal myocardial fiber morphology                          | muscle                   | J:209752        |
| Lrp1<tm2Her> Tagln-cre     | Smooth Muscle     | MGI:610294         | aortic valve regurgitation                                    | cardiovascular system    | J:209752        |
| Lrp1<tm2Her> Tagln-cre     | Smooth Muscle     | MGI:610294         | ascending aorta dilation                                      | cardiovascular system    | J:209752        |
| Lrp1<tm2Her> Tagln-cre     | Smooth Muscle     | MGI:610294         | cardiac interstitial fibrosis                                 | cardiovascular system    | J:209752        |
| Lrp1<tm2Her> Tagln-cre     | Smooth Muscle     | MGI:610294         | decreased cardiac muscle contractility                        | cardiovascular system    | J:209752        |
| Lrp1<tm2Her> Tagln-cre     | Smooth Muscle     | MGI:610294         | decreased cardiac muscle contractility                        | muscle                   | J:209752        |
| Lrp1<tm2Her> Tagln-cre     | Smooth Muscle     | MGI:610294         | decreased systemic arterial diastolic blood pressure          | cardiovascular system    | J:209752        |
| Lrp1<tm2Her> Tagln-cre     | Smooth Muscle     | MGI:610294         | dilated aorta bulb                                            | cardiovascular system    | J:209752        |
| Lrp1<tm2Her> Tagln-cre     | Smooth Muscle     | MGI:610294         | dilated cardiomyopathy                                        | cardiovascular system    | J:209752        |
| Lrp1<tm2Her> Tagln-cre     | Smooth Muscle     | MGI:610294         | dilated cardiomyopathy                                        | muscle                   | J:209752        |
| Lrp1<tm2Her> Tagln-cre     | Smooth Muscle     | MGI:610294         | dilated heart left ventricle                                  | cardiovascular system    | J:209752        |
| Lrp1<tm2Her> Tagln-cre     | Smooth Muscle     | MGI:610294         | enlarged heart                                                | cardiovascular system    | J:209752        |
| Lrp1<tm2Her> Tagln-cre     | Smooth Muscle     | MGI:610294         | enlarged heart                                                | growth/size/body region  | J:209752        |
| Lrp1<tm2Her> Tagln-cre     | Smooth Muscle     | MGI:610294         | increased heart left ventricle size                           | cardiovascular system    | J:209752        |
| Lrp1<tm2Her> Tagln-cre     | Smooth Muscle     | MGI:610294         | increased heart weight                                        | cardiovascular system    | J:209752        |
| Lrp1<tm2Her> Tagln-cre     | Smooth Muscle     | MGI:610294         | increased heart weight                                        | growth/size/body region  | J:209752        |
| Lrp1<tm2Her> Tagln-cre     | Smooth Muscle     | MGI:610294         | increased pulse pressure                                      | cardiovascular system    | J:209752        |
| Lrp1<tm2Her> Tagln-cre     | Smooth Muscle     | MGI:610294         | perivascular fibrosis                                         | cardiovascular system    | J:209752        |

**Table S2 Homozygous Lrp1<sup>tm1.1(KOMP)Wtsi</sup> mouse phenotypes.**

| Procedure                        | Parameter                                 | pValue | Mice Abnormal | Mice Normal | Total controls |
|----------------------------------|-------------------------------------------|--------|---------------|-------------|----------------|
| Viability E12.5 Secondary Screen | preweaning lethality, complete penetrance | -      | 6             | 0           | -              |
| Gross Morphology Embryo E12.5    | Embryo Size                               | 0      | 3             | 3           | 1682           |
| Gross Morphology Embryo E12.5    | Limb Bud Morphology                       | 0      | 2             | 4           | 1682           |
| Gross Morphology Embryo E12.5    | Pallor                                    | 0      | 2             | 4           | 1682           |
| Gross Morphology Embryo E12.5    | Pericardium Morphology                    | 0      | 2             | 4           | 1682           |
| Gross Morphology Embryo E12.5    | Delayed embryonic development             | 1      | 1             | 5           | 1682           |
| Gross Morphology Embryo E12.5    | Neural Tube Closure                       | 1      | 0             | 6           | 1671           |
| Gross Morphology Embryo E12.5    | Microphthalmia                            | 1      | 0             | 4           | 1550           |
| Gross Morphology Embryo E12.5    | Blebs                                     | 1      | 0             | 6           | 1682           |
| Gross Morphology Embryo E12.5    | Ear Morphology                            | 1      | 0             | 6           | 1682           |
| Gross Morphology Embryo E12.5    | Forebrain morphology                      | 1      | 0             | 6           | 1682           |
| Gross Morphology Embryo E12.5    | Heart looping                             | 1      | 0             | 6           | 1682           |
| Gross Morphology Embryo E12.5    | Anophthalmia                              | 1      | 0             | 4           | 1550           |
| Gross Morphology Placenta E12.5  | Placenta Development                      | 1      | 0             | 7           | 1575           |
| Gross Morphology Embryo E12.5    | Visceral yolk sac morphology              | 1      | 0             | 6           | 1682           |
| Gross Morphology Embryo E12.5    | Microcephaly                              | 1      | 0             | 6           | 1667           |
| Gross Morphology Embryo E12.5    | Facial cleft                              | 1      | 0             | 6           | 1682           |
| Gross Morphology Placenta E12.5  | Placenta Morphology                       | 1      | 0             | 7           | 1575           |
| Gross Morphology Embryo E12.5    | Pale yolk sac                             | 1      | 0             | 6           | 1682           |
| Gross Morphology Embryo E12.5    | Midbrain morphology                       | 1      | 0             | 6           | 1671           |
| Gross Morphology Embryo E12.5    | Hindbrain morphology                      | 1      | 0             | 6           | 1682           |
| Gross Morphology Placenta E12.5  | Placenta Vasculature                      | 1      | 0             | 7           | 1575           |
| Gross Morphology Embryo E12.5    | Head shape                                | 1      | 0             | 6           | 1670           |
| Gross Morphology Embryo E12.5    | Abdominal wall                            | 1      | 0             | 6           | 1682           |
| Gross Morphology Embryo E12.5    | Pale Liver                                | 1      | 0             | 6           | 1682           |
| Gross Morphology Embryo E12.5    | Edema                                     | 1      | 0             | 6           | 1682           |
| Gross Morphology Embryo E12.5    | Tail Morphology                           | 1      | 0             | 6           | 1682           |
| Gross Morphology Placenta E12.5  | Placenta Size                             | 1      | 0             | 7           | 1575           |
| Gross Morphology Placenta E12.5  | Umbilical cord morphology                 | 1      | 0             | 7           | 1575           |
| Gross Morphology Embryo E12.5    | Craniofacial morphology                   | 1      | 0             | 6           | 1667           |
| Gross Morphology Embryo E12.5    | Hemorrhage                                | 1      | 0             | 6           | 1682           |

**Table S3 Heterozygous Lrp1<sup>tm1.1(KOMP)Wtsi</sup> significant mouse phenotypes.**

| Procedure                                       | Parameter                                             | Female pValue | Male pValue | Combined pValue |
|-------------------------------------------------|-------------------------------------------------------|---------------|-------------|-----------------|
| Clinical Chemistry                              | Alkaline phosphatase                                  | 1.10E-04      | 6.30E-03    | 1.82E-05        |
| Clinical Chemistry                              | Triglycerides                                         | 6.36E-01      | 2.38E-05    | 2.38E-05        |
| Heart Weight                                    | Heart weight                                          | 7.74E-05      | 6.03E-04    | 7.74E-05        |
| Plasma Chemistry                                | Triglycerides                                         | 4.31E-03      | 4.73E-03    | 1.08E-04        |
| Electrocardiogram (ECG)                         | PR                                                    | 3.90E-04      | 1.94E-01    | 3.90E-04        |
| Electrocardiogram (ECG)                         | PQ                                                    | 5.55E-04      | 1.25E-01    | 5.55E-04        |
| Clinical Chemistry                              | Glucose                                               | 4.02E-02      | 2.53E-03    | 6.27E-04        |
| Eye Morphology                                  | Lens                                                  | 2.02E-03      | 4.15E-02    | 6.55E-04        |
| Sleep Wake                                      | Peak wake with respect to dark onset median           | 1.55E-02      | 1.03E-02    | 7.13E-04        |
| Open Field - centre start                       | Periphery average speed                               | 1.52E-03      | 5.08E-01    | 7.52E-04        |
| Electrocardiogram (ECG)                         | ST                                                    | 1.03E-02      | 2.41E-02    | 1.04E-03        |
| Open Field - centre start                       | Center distance travelled                             | 1.30E-03      | 3.53E-03    | 1.47E-03        |
| Grip Strength                                   | Forelimb grip strength normalised against body weight | 1.46E-03      | 1.55E-01    | 2.63E-03        |
| Hole-board Exploration                          | Total holepokes                                       | 9.52E-02      | 3.66E-03    | 1.71E-03        |
| Open Field - centre start                       | Number of rears - total                               | 1.92E-03      | 7.86E-01    | 1.92E-03        |
| Electrocardiogram (ECG)                         | HR                                                    | 1.19E-02      | 3.46E-02    | 2.28E-03        |
| Open Field - centre start                       | Whole arena average speed                             | 4.00E-03      | 2.17E-01    | 2.32E-03        |
| Open Field - centre start                       | Distance travelled - total                            | 4.13E-03      | 2.14E-01    | 2.40E-03        |
| Open Field - centre start                       | Whole arena resting time                              | 3.98E-03      | 2.97E-01    | 2.40E-03        |
| Electrocardiogram (ECG)                         | CV                                                    | 1.86E-02      | 3.54E-02    | 2.96E-03        |
| Electrocardiogram (ECG)                         | RR                                                    | 1.48E-02      | 4.70E-02    | 3.71E-03        |
| Eye Morphology                                  | Vitreous                                              | 1.00E+00      | 3.95E-03    | 2.08E-02        |
| Body Composition (DEXA lean/fat)                | Lean mass                                             | 4.08E-03      | 8.14E-01    | 5.95E-03        |
| Plasma Chemistry                                | Free fatty acids                                      | 3.57E-02      | 4.42E-02    | 5.10E-03        |
| Eye Morphology                                  | Fusion between cornea and lens                        | 9.03E-03      | 1.00E+00    | 5.22E-03        |
| Electrocardiogram (ECG)                         | rMSSD                                                 | 1.20E-02      | 7.87E-02    | 5.77E-03        |
| Eye Morphology                                  | Eye                                                   | 7.40E-03      | 1.00E+00    | 7.56E-03        |
| Electrocardiogram (ECG)                         | HRV                                                   | 3.70E-02      | 5.80E-02    | 1.05E-02        |
| Sleep Wake                                      | Sleep daily percent                                   | 7.16E-01      | 1.17E-02    | 3.76E-02        |
| Grip Strength                                   | Forelimb grip strength measurement mean               | 2.75E-02      | 1.03E-01    | 1.34E-02        |
| Eye Morphology                                  | Pupil Dilation                                        | 1.40E-02      | 1.00E+00    | 2.87E-02        |
| Light-Dark Test                                 | Percent time in dark                                  | 1.76E-02      | 3.97E-01    | 1.45E-02        |
| Light-Dark Test                                 | Percent time in light                                 | 1.76E-02      | 3.97E-01    | 1.45E-02        |
| Open Field - centre start                       | Percentage center time                                | 1.60E-02      | 1.32E-01    | 2.13E-02        |
| Open Field - centre start                       | Center permanence time                                | 1.60E-02      | 1.32E-01    | 2.13E-02        |
| Body Composition (DEXA lean/fat)                | Lean/Body weight                                      | 1.73E-02      | 7.73E-01    | 1.78E-02        |
| Eye Morphology                                  | Pupil Light Response                                  | 1.79E-02      | 1.00E+00    | 1.92E-02        |
| Light-Dark Test                                 | Dark side time spent                                  | 2.31E-02      | 6.84E-01    | 2.64E-02        |
| Light-Dark Test                                 | Light side time spent                                 | 2.31E-02      | 6.84E-01    | 2.64E-02        |
| Open Field - centre start                       | Periphery distance travelled                          | 4.49E-02      | 9.34E-01    | 2.82E-02        |
| Light-Dark Test                                 | Time mobile light side                                | 3.43E-02      | 1.17E-01    | 3.43E-02        |
| Sleep Wake                                      | Sleep light phase percent                             | 3.93E-01      | 3.47E-02    | 3.80E-02        |
| Acoustic Startle and Pre-pulse Inhibition (PPI) | Response amplitude - S                                | 2.30E-01      | 4.33E-02    | 4.93E-02        |
| Body Composition (DEXA lean/fat)                | Bone Mineral Content (excluding skull)                | 4.46E-02      | 9.07E-01    | 4.97E-02        |

**Table S4 LRP1 human correlated genes from Human Protein Atlas linked to OMIM syndromes.**

| <b>Gene</b>     | <b>Correlation to LRP1</b> | <b>Group</b>            | <b>Phenotype</b>                                                                                          |
|-----------------|----------------------------|-------------------------|-----------------------------------------------------------------------------------------------------------|
| <i>SH3PXD2B</i> | 0.8614                     | HPA Tissue cluster      | Frank-ter Haar syndrome, Autosomal recessive                                                              |
| <i>MFAP5</i>    | 0.7843                     | HPA single cell cluster | Aortic aneurysm, familial thoracic.9, Autosomal dominant                                                  |
| <i>GSC</i>      | 0.7885                     | HPA single cell cluster | Short stature, auditory canal atresia, mandibular hypoplasia, skeletal abnormalities, Autosomal recessive |
| <i>TGFB3</i>    | 0.8754                     | HPA Tissue cluster      | Arrhythmogenic right ventricular dysplasia 1, Loeys-Dietz syndrome 5, Autosomal dominant                  |
| <i>MYOC</i>     | 0.8343                     | HPA single cell cluster | Glaucoma 1A, primary open angle, Autosomal dominant                                                       |
| <i>PDGFRL</i>   | 0.8228                     | HPA single cell cluster | Hepatocellular cancer, somatic; Colorectal cancer, somatic                                                |
| <i>GSN</i>      | 0.8148                     | HPA single cell cluster | Amyloidosis, Finnish type, Autosomal dominant                                                             |
| <i>TNXB</i>     | 0.8058                     | HPA single cell cluster | Ehlers-Danlos syndrome, classic-like, Autosomal recessive                                                 |
| <i>ADCY3</i>    | 0.9088                     | HPA Tissue cluster      | Obesity, susceptibility to, Autosomal recessive                                                           |
| <i>BOC</i>      | 0.8525                     | HPA single cell cluster | none                                                                                                      |
| <i>VIT</i>      | 0.8466                     | HPA single cell cluster | none                                                                                                      |
| <i>GAS1</i>     | 0.8407                     | HPA single cell cluster | none                                                                                                      |
| <i>MAP1LC3C</i> | 0.8054                     | HPA single cell cluster | none                                                                                                      |
| <i>FBLN2</i>    | 0.8037                     | HPA single cell cluster | none                                                                                                      |
| <i>PODN</i>     | 0.7937                     | HPA single cell cluster | none                                                                                                      |
| <i>HTRA3</i>    | 0.7894                     | HPA single cell cluster | none                                                                                                      |
| <i>PCOLCE2</i>  | 0.7852                     | HPA single cell cluster | none                                                                                                      |
| <i>LRRN4CL</i>  | 0.7828                     | HPA single cell cluster | none                                                                                                      |
| <i>GFPT2</i>    | 0.9281                     | HPA Tissue cluster      | none                                                                                                      |
| <i>COL5A3</i>   | 0.9                        | HPA Tissue cluster      | none                                                                                                      |
| <i>GYG2</i>     | 0.893                      | HPA Tissue cluster      | none                                                                                                      |
| <i>PAMR1</i>    | 0.8842                     | HPA Tissue cluster      | none                                                                                                      |
| <i>SEMA4C</i>   | 0.8789                     | HPA Tissue cluster      | none                                                                                                      |
| <i>COLEC12</i>  | 0.8684                     | HPA Tissue cluster      | none                                                                                                      |
| <i>TMEM132C</i> | 0.8667                     | HPA Tissue cluster      | none                                                                                                      |
| <i>ACVR1C</i>   | 0.8649                     | HPA Tissue cluster      | none                                                                                                      |
| <i>FGF2</i>     | 0.8579                     | HPA Tissue cluster      | none                                                                                                      |
| <i>ADAMTS4</i>  | 0.8561                     | HPA Tissue cluster      | none                                                                                                      |
| <i>GPR146</i>   | 0.8526                     | HPA Tissue cluster      | none                                                                                                      |
| <i>KCNE4</i>    | 0.8456                     | HPA Tissue cluster      | none                                                                                                      |

**Table S5 Traits significantly associated with *LRP1* eQTL rs11172113.**

| Study ID                        | Trait                                                                          | Lead Variant P-value | PMID     | Study N   |
|---------------------------------|--------------------------------------------------------------------------------|----------------------|----------|-----------|
| GCST011062                      | Migraine and/or pulse pressure                                                 | 2.00E-50             | 32632093 | 1,094,154 |
| GCST003720                      | Migraine                                                                       | 6.00E-49             | 27322543 | 375,752   |
| GCST005337                      | Headache                                                                       | 5.00E-47             | 29397368 | 223,782   |
| NEALE2_6159_1                   | Headache   pain type(s) experienced in last month                              | 8.33E-46             |          | 360,391   |
| GCST003986                      | Migraine                                                                       | 6.00E-36             | 27182965 | 283,985   |
| GCST007080                      | Lung function (FEV1/FVC)                                                       | 6.00E-29             | 30595370 | 370,000   |
| NEALE2_20002_1265               | Migraine   non-cancer illness code, self-reported                              | 3.99E-24             |          | 361,141   |
| GCST007431                      | Lung function (FEV1/FVC)                                                       | 7.04E-21             | 30804560 | 400,052   |
| GCST002081                      | Migraine                                                                       | 4.00E-19             | 23793025 | 118,710   |
| NEALE2_6154_3                   | Paracetamol   medication for pain relief, constipation, heartburn              | 9.84E-19             |          | 357,084   |
| GCST011056                      | Migraine without aura and/or pulse pressure                                    | 2.00E-17             | 32632093 | 1,094,154 |
| NEALE2_6154_100                 | None of the above   medication for pain relief, constipation, heartburn        | 3.92E-17             |          | 357,084   |
| GCST003721                      | Migraine without aura                                                          | 4.00E-16             | 27322543 | 147,790   |
| GCST007938                      | Medication use (anilides)                                                      | 9.00E-16             | 31015401 | 179,810   |
| FINNGEN_R5_MIGRAINE_T<br>RIPTAN | Migraine                                                                       | 1.00E-15             |          | 218,792   |
| NEALE2_20003_203846015<br>0     | Paracetamol   treatment/medication code                                        | 1.10E-14             |          | 361,141   |
| GCST010722                      | Spontaneous coronary artery dissection                                         | 1.00E-13             | 32374345 | 2,484     |
| NEALE2_6154_2                   | Ibuprofen (e.g. nurofen)   medication for pain relief, constipation, heartburn | 1.15E-13             |          | 357,084   |
| GCST007939                      | Medication use (antimigraine preparations)                                     | 3.00E-13             | 31015401 | 119,844   |
| NEALE2_3799                     | Headaches for 3+ months                                                        | 1.01E-12             |          | 70,181    |
| GCST007800                      | Asthma (childhood onset)                                                       | 1.20E-12             | 30929738 | 561,282   |
| GCST90000027                    | Appendicular lean mass                                                         | 4.20E-11             | 33097823 | 244,730   |
| GCST002078                      | Migraine without aura                                                          | 1.00E-10             | 23793025 | 76,534    |
| GCST011059                      | Migraine with aura and/or pulse pressure                                       | 2.00E-10             | 32632093 | 1,094,154 |
| GCST007430                      | Peak expiratory flow                                                           | 3.25E-10             | 30804560 | 345,265   |
| NEALE2_20003_114087131<br>0     | Ibuprofen   treatment/medication code                                          | 1.96E-09             |          | 361,141   |
| GCST001105                      | Migraine                                                                       | 4.00E-09             | 21666692 | 41,007    |
| GCST001248_2                    | Pulmonary function [FEV1/FVC]                                                  | 1.00E-08             | 21946350 | 94,612    |
| GCST001563                      | Migraine                                                                       | 3.00E-08             | 22683712 | 12,066    |
| GCST90000582                    | Spontaneous coronary artery dissection                                         | 3.00E-08             | 32887874 | 8,903     |

**Table S6 LRP1 linked toxicogenomics from the CTDbase.**

| <b>Chemical Name</b>         | <b>Chemical ID</b> | <b>CAS RN</b> | <b>Interaction Count</b> | <b>Organism Count</b> |
|------------------------------|--------------------|---------------|--------------------------|-----------------------|
| bisphenol A                  | C006780            | 80-05-7       | 10                       | 3                     |
| Tetrachlorodibenzodioxin     | D013749            | 1746-01-6     | 8                        | 2                     |
| Copper                       | D003300            | 7440-50-8     | 7                        | 2                     |
| Acetaminophen                | D000082            | 103-90-2      | 4                        | 3                     |
| Rosiglitazone                | D000077154         |               | 5                        | 2                     |
| Capsaicin                    | D002211            | 404-86-4      | 9                        | 1                     |
| Tetradecanoylphorbol Acetate | D013755            | 16561-29-8    | 4                        | 2                     |
| Tobacco Smoke Pollution      | D014028            |               | 4                        | 2                     |
| Aflatoxin B1                 | D016604            | 1162-65-8     | 3                        | 2                     |
| Benzo(a)pyrene               | D001564            | 50-32-8       | 3                        | 2                     |
| Carbon Tetrachloride         | D002251            | 56-23-5       | 3                        | 2                     |
| Cyclosporine                 | D016572            | 59865-13-3    | 3                        | 2                     |
| Diethylnitrosamine           | D004052            | 55-18-5       | 3                        | 2                     |
| Dronabinol                   | D013759            |               | 3                        | 2                     |
| Ethinyl Estradiol            | D004997            | 57-63-6       | 3                        | 2                     |
| Thioacetamide                | D013853            | 62-55-5       | 3                        | 2                     |
| Ethanol                      | D000431            | 64-17-5       | 5                        | 1                     |
| Plant Preparations           | D028321            |               | 5                        | 1                     |
| Cisplatin                    | D002945            | 15663-27-1    | 4                        | 1                     |
| Dexamethasone                | D003907            | 50-02-2       | 4                        | 1                     |
| Air Pollutants               | D000393            |               | 2                        | 2                     |
| bis(4-hydroxyphenyl)sulfone  | C543008            | 80-09-1       | 2                        | 2                     |
| Cadmium Chloride             | D019256            | 10108-64-2    | 2                        | 2                     |
| Oxygen                       | D010100            | 7782-44-7     | 2                        | 2                     |
| sodium arsenite              | C017947            | 13768-07-5    | 2                        | 2                     |
| Valproic Acid                | D014635            | 99-66-1       | 2                        | 2                     |
| 1-Methyl-3-isobutylxanthine  | D015056            | 28822-58-4    | 3                        | 1                     |
| Indomethacin                 | D007213            | 53-86-1       | 3                        | 1                     |
| tanshinone                   | C021751            | 568-73-0      | 3                        | 1                     |
| Aluminum Chloride            | D000077410         |               | 2                        | 1                     |

Arrhythmogenic right ventricular cardiomyopathy (ARVC) (FDR 0.0041)  
Hypertrophic cardiomyopathy (HCM) (FDR 0.0050)  
Dilated cardiomyopathy (DCM) (FDR 0.0058)

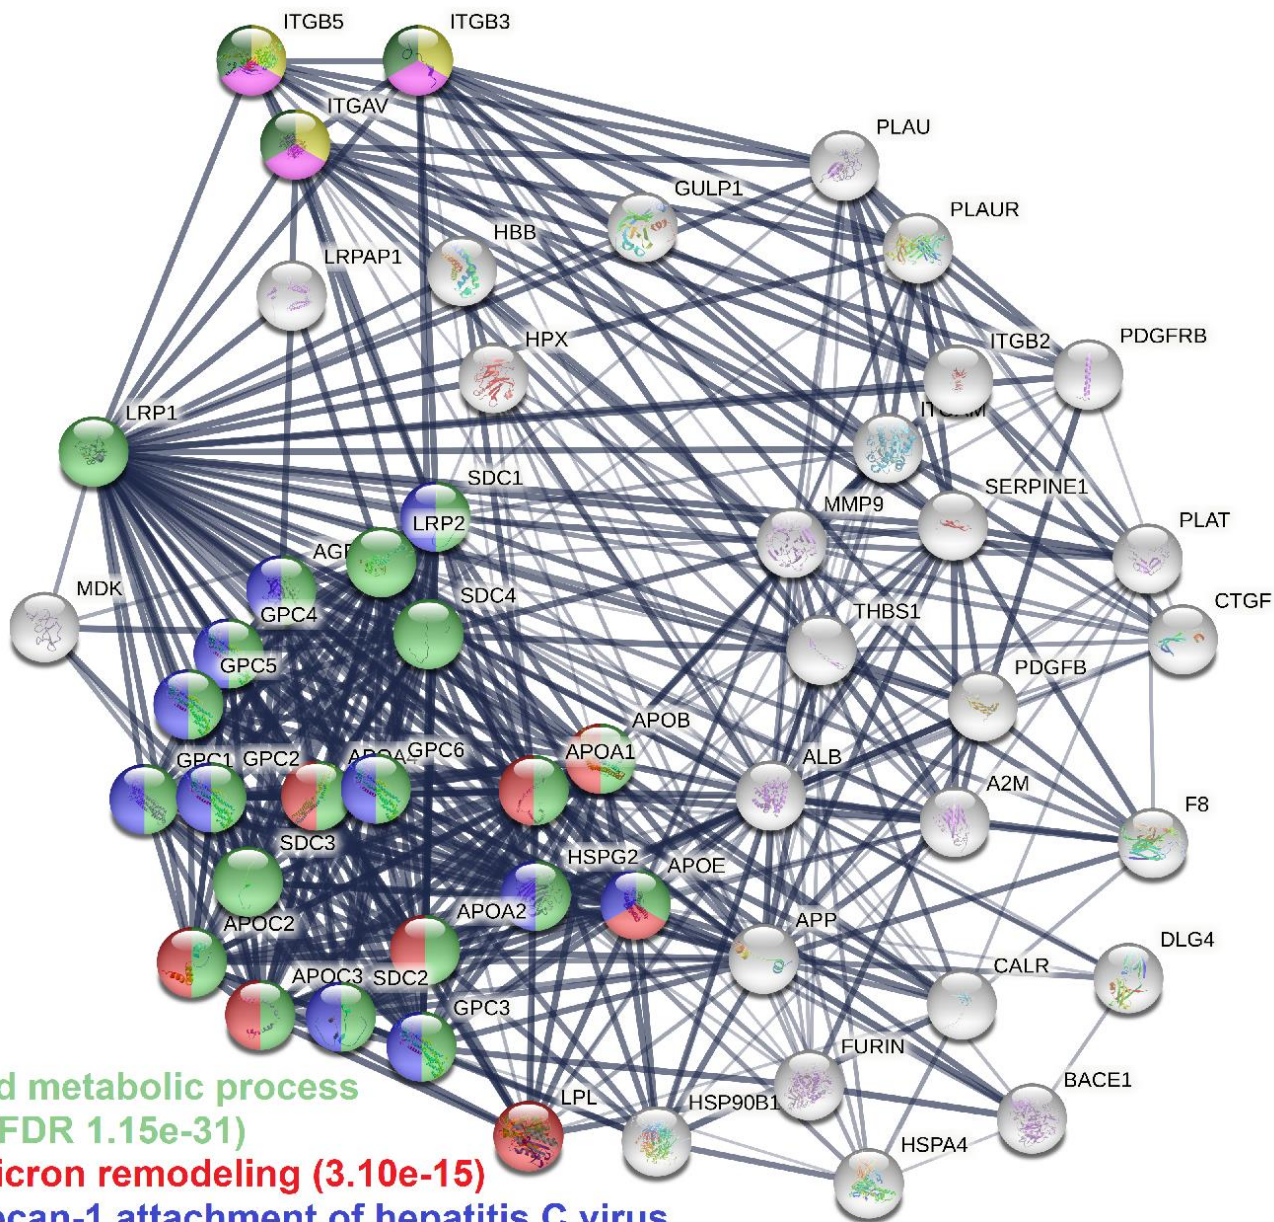

retinoid metabolic process  
(FDR 1.15e-31)  
chylomicron remodeling (3.10e-15)  
Syndecan-1 attachment of hepatitis C virus  
(PMID: 23576506; FDR 2.92e-19)

Figure S1 STRING insights for LRP1 protein-interacting network. Colored genes are enriched for the labeled gene ontology term based on the false discovery rate (FDR). Interaction partners are shown based on database interactions, experimental insights, and textmining where the width of the line connecting any two nodes based on strength of correlation. Map was created with <https://string-db.org/>.



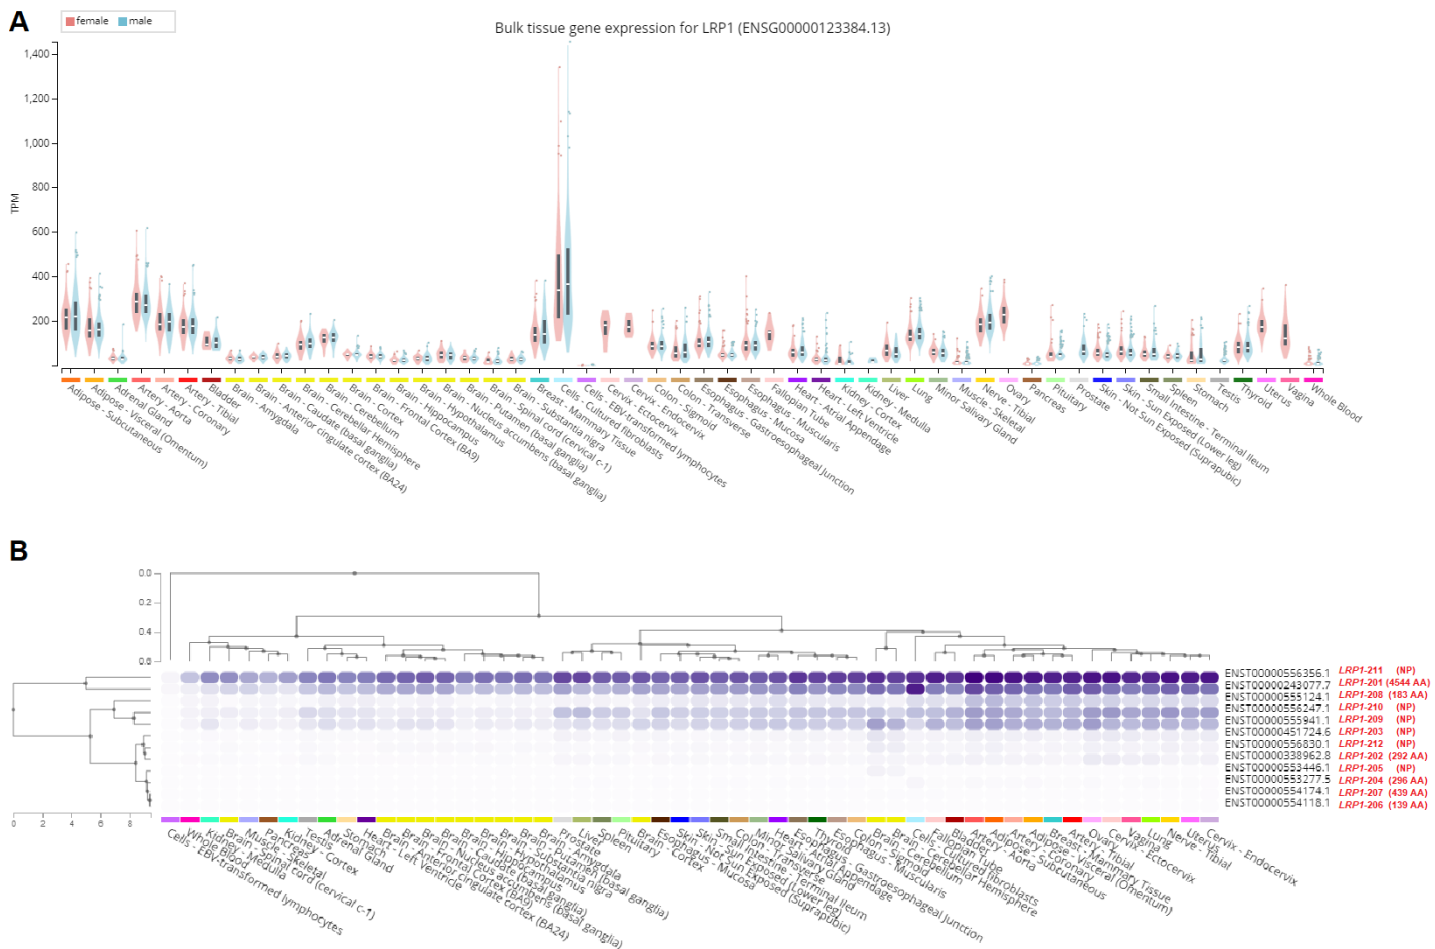

**Figure S2 Sex differences in expression of *LRP1* between males and females based on GTEx data. A)** Tissue expression of *LRP1* shown as transcripts per million (TPM) for female (red) or male (blue). Data is plotted as a violin plot of diversity for multiple human samples. **B)** Isoforms of *LRP1* expressed in human tissues. The darker blue represents a higher expression. In red are the numbered isoforms with the number of amino acids coded by the transcript or if it does not code for a protein (NP).



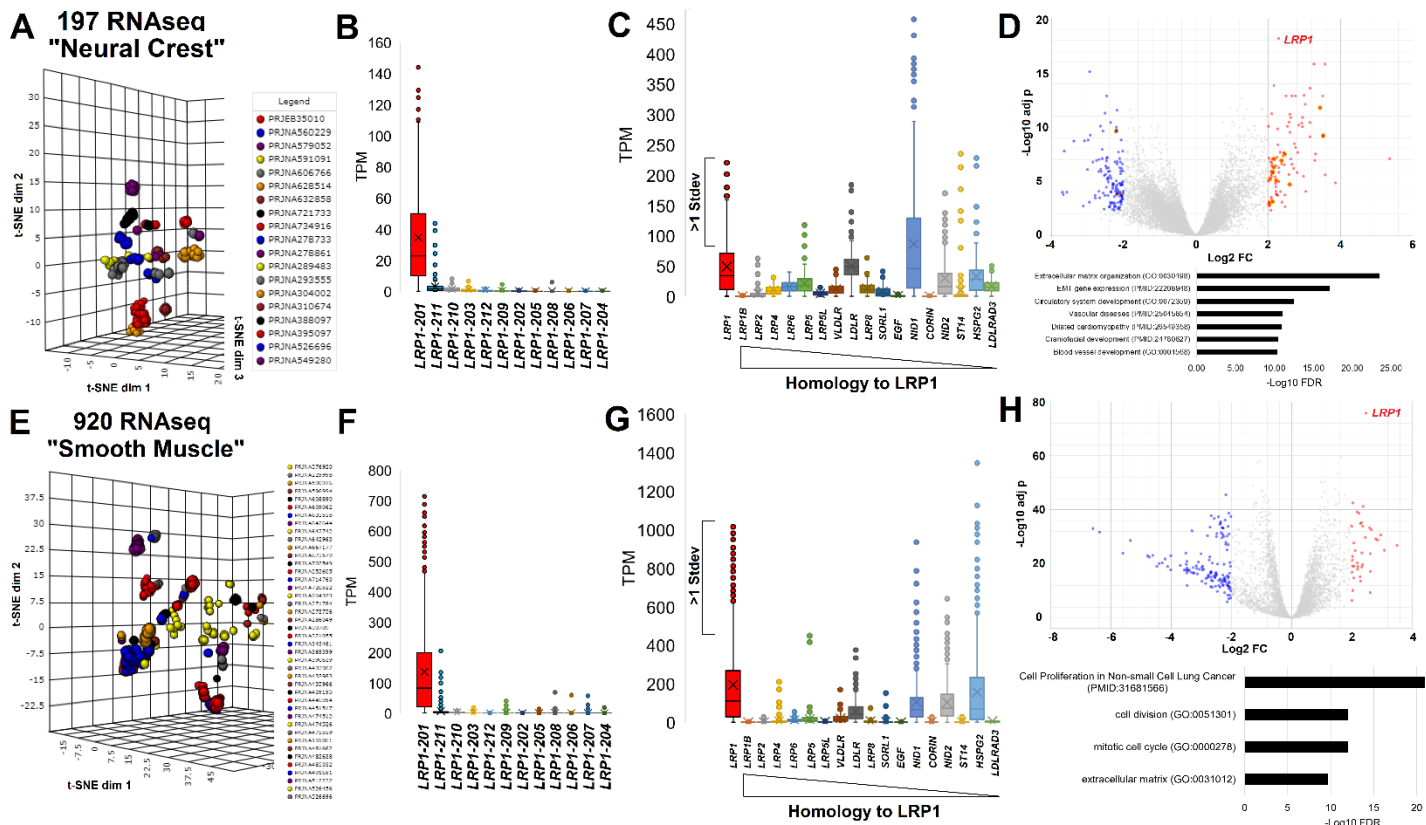

**Figure S3 *LRP1* expression to phenotypic insights in neural crest-derived cell types. A-H)** Neural crest based RNAseq for 197 datasets (A-D) or 920 smooth muscle (E-H) showing a three-dimensional principal component plot (A/E), *LRP1* transcript annotations as a box and whisker plot (B/F), gene-level expression for each gene shown as a box and whisker plot (C/G), and genes that are significantly different in *LRP1* expression >1 standard deviation datasets shown as a volcano plot with relevant enriched terms listed below (D/H). Raw processed data for neural crest RNAseq can be found at <https://doi.org/10.6084/m9.figshare.14920644.v1> and the smooth muscle RNAseq at <https://doi.org/10.6084/m9.figshare.14991444.v1>.

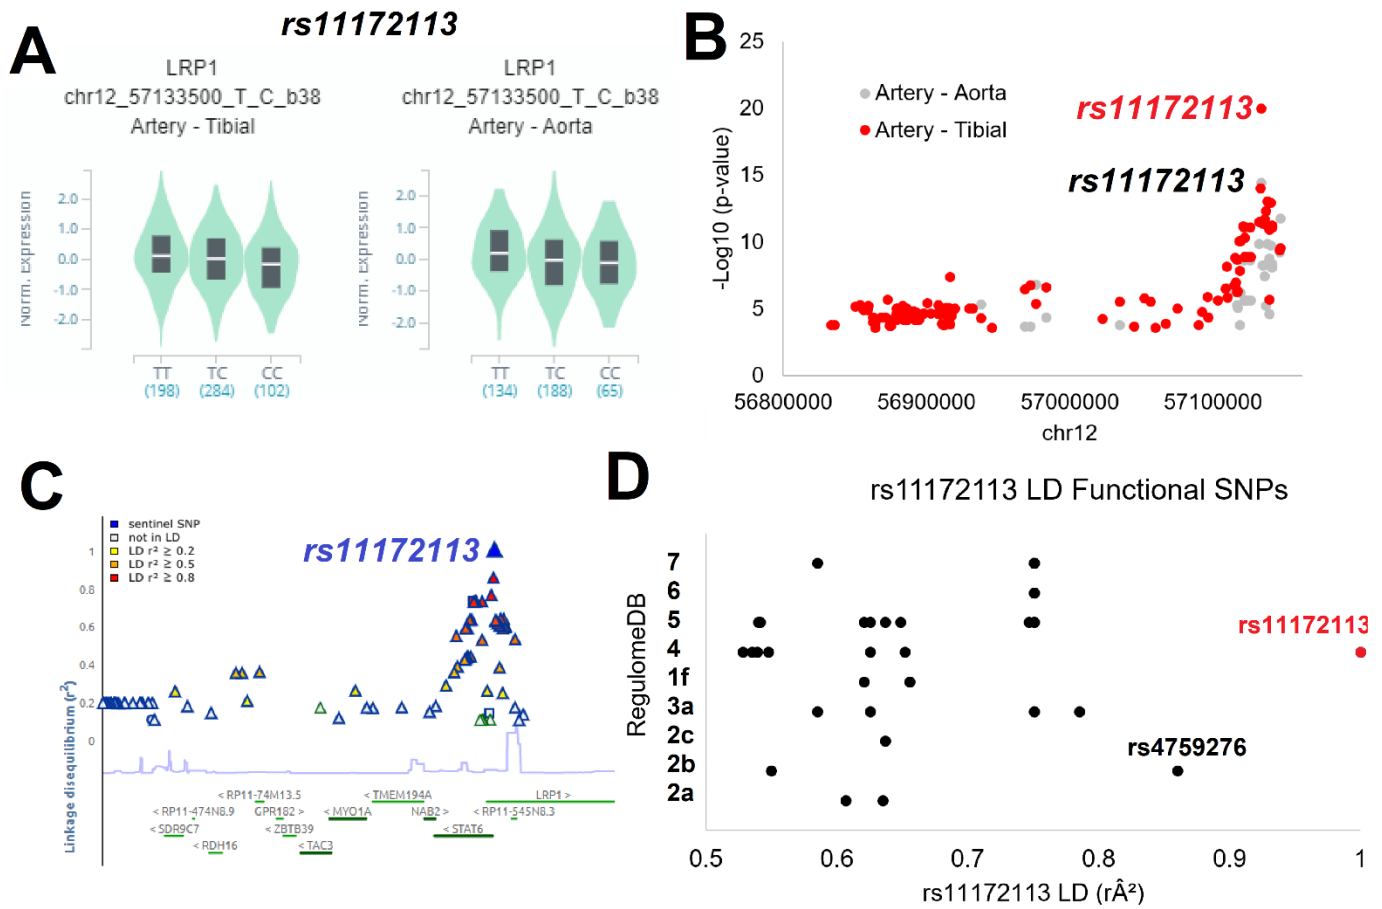

**Figure S4 GWAS loci association with vascular phenotypes and *LRP1* expression.** **A**) Violin plot of *rs1172113* for *LRP1* expression in tibial (left) or aorta (right) artery for homozygous or heterozygous individuals. **B**) Plot of variant associations (y-axis) in the aorta (gray) or tibial (red) artery for *LRP1* expression relative to chromosome 12 location (x-axis). **C**) Linkage disequilibrium (LD) SNPs (y-axis) with *rs1172113* relative to gene positions on chromosome 12 (x-axis). **D**) Functional gene regulation knowledge from RegulomeDB (y-axis) for SNPs in LD with *rs1172113* (x-axis). The lower the value on the Y-axis, the more knowledge that is present for gene regulation potential.

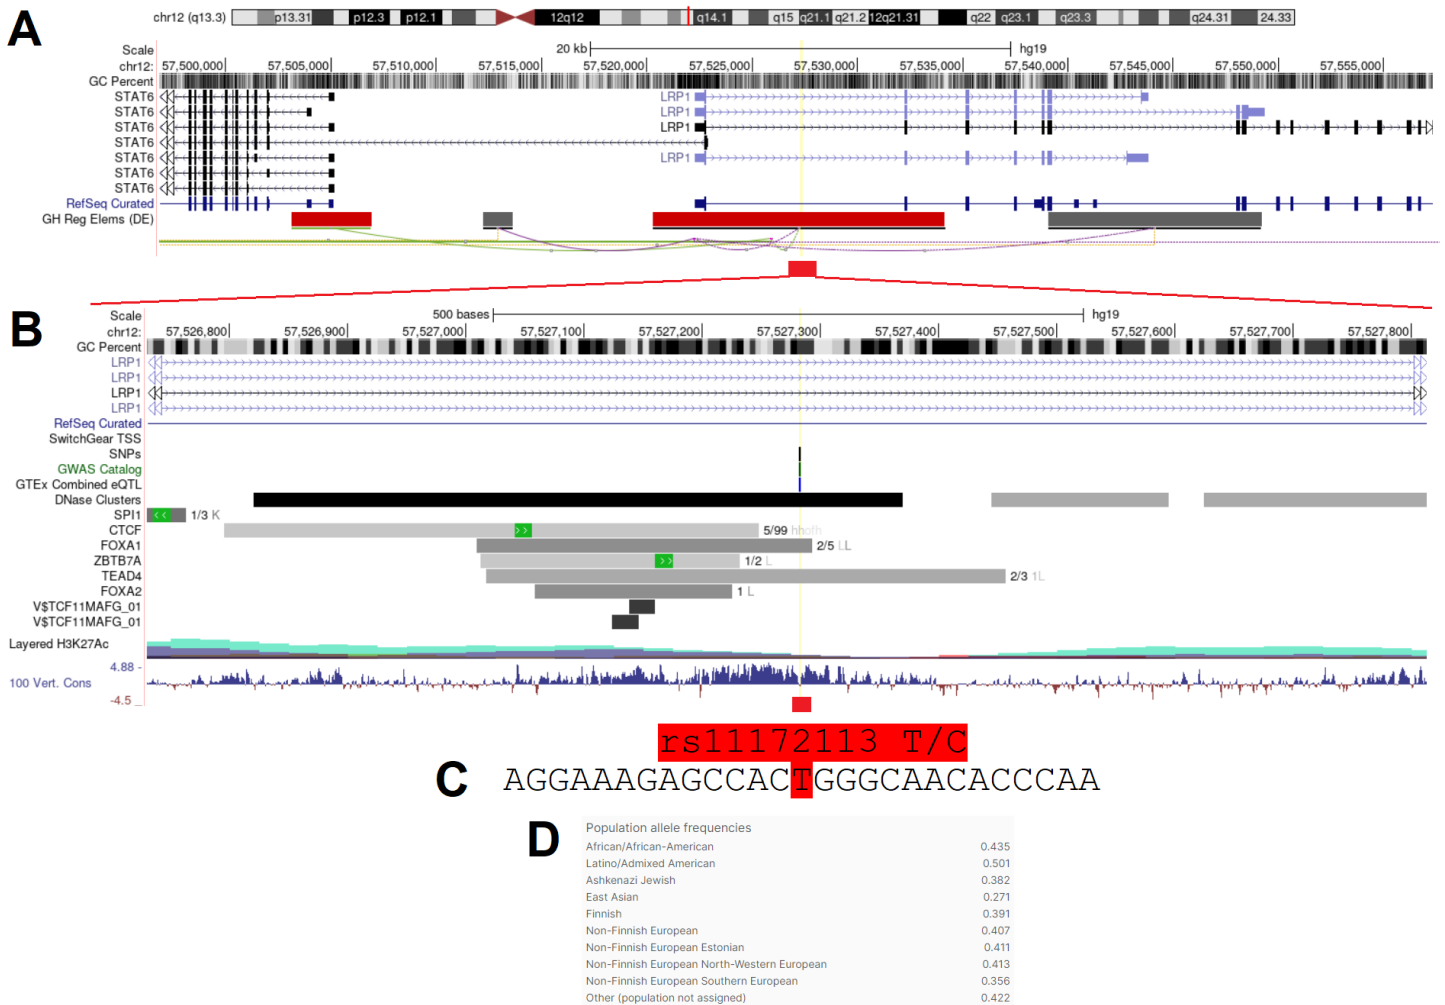

**Figure S5 Genome browser view of rs11172113 within an intron of LRP1. A)** View of the rs11172113 (yellow line) variant relative to exons of LRP1 and STAT6. Shown below the genes are the GeneHancer annotated enhancers with known looping data connecting the sites. **B)** A zoom-in view of the variant showing transcription factor regulation sites and conservation. Any listed protein shows known ChIP-Seq binding peaks at those locations. **C)** Sequence with the variant highlighted in red. **D)** Population allele frequencies based on gnomAD data.
